# Supplementary material
Source: PubMed Central journal article supplement (PMC2712053)
Supplement: mmc1.pdf [file mmc1.pdf]

Biophysical Journal, Volume 96

**Supporting Material**

**Alteration of Sugar-Induced Conformational Changes of the Melibiose Permease  
by Mutating Arg141 in Loop 4-5**

Xavier León, Gérard Leblanc, and Esteve Padrós

**Alteration of Sugar-Induced Conformational Changes of the Melibiose  
Permease by Mutating Arg141 in Loop 4-5**

**Xavier León<sup>\*</sup>, Gérard Leblanc<sup>†</sup> and Esteve Padrós<sup>\*</sup>**

<sup>\*</sup>Unitat de Biofísica, Departament de Bioquímica i de Biologia Molecular, Facultat de Medicina, and Centre d'Estudis en Biofísica, Universitat Autònoma de Barcelona, 08193 Bellaterra, Barcelona, Spain; <sup>†</sup>Institut de Biologie et Technologies-Saclay, Service de Bioenergetique, Biologie Structurale et Mécanismes, CEA-Saclay, F-91191 Gif sur Yvette, France

Supplementary data

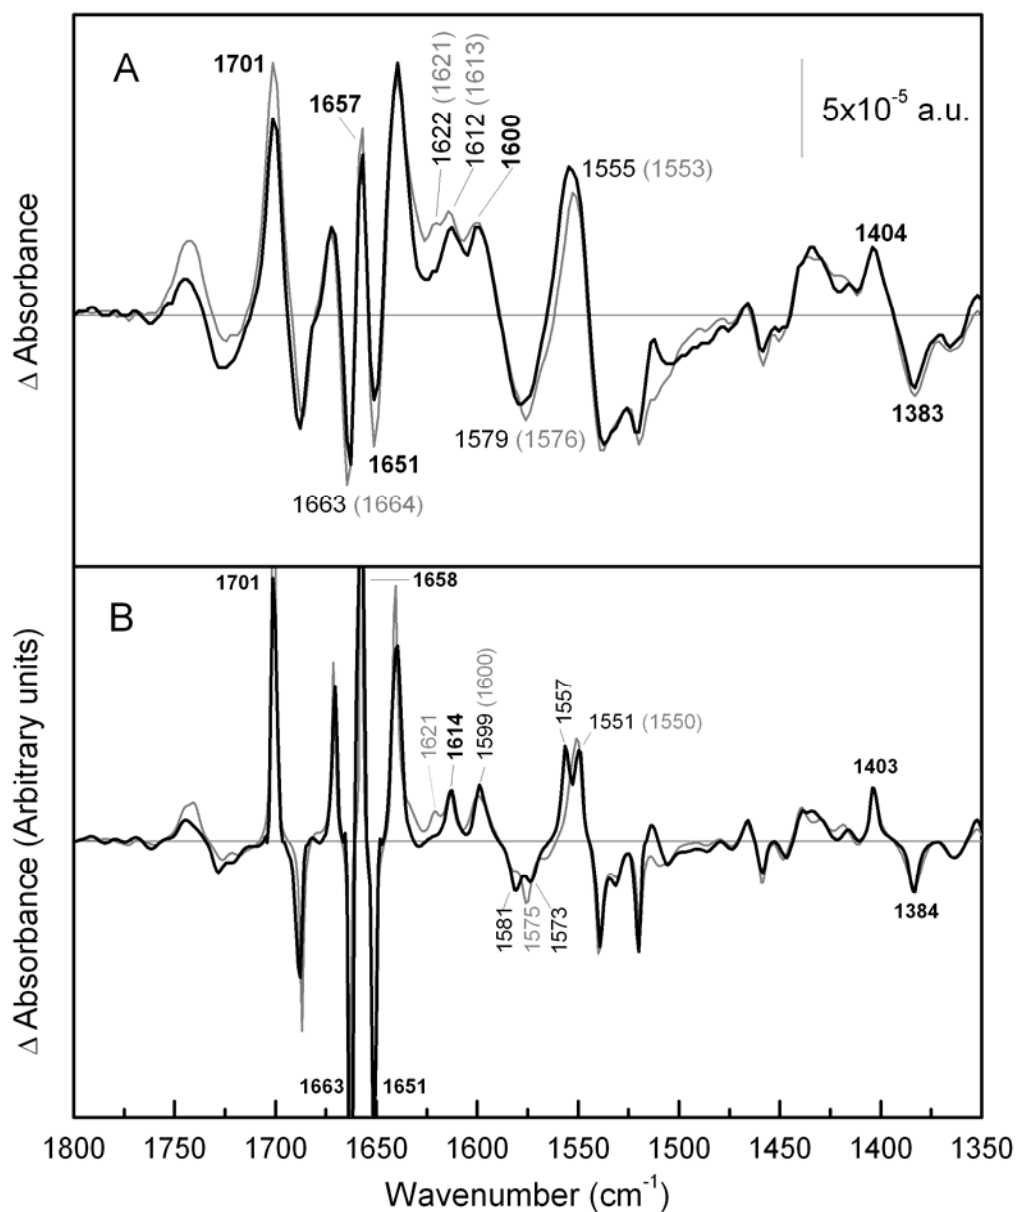

Fig. S1. Comparison of  $\text{Na}^+$ -induced difference spectra of Cys-less and WT permeases. (A) (*solid line*) difference spectrum of Cys-less in 20 mM MES, 100 mM KCl, 10 mM NaCl, pH 6,6 minus Cys-less in 20 mM MES, 110 mM KCl, pH 6,6; (*shaded line*) difference spectrum of WT under the same conditions. (B) deconvoluted difference spectra of top panel.

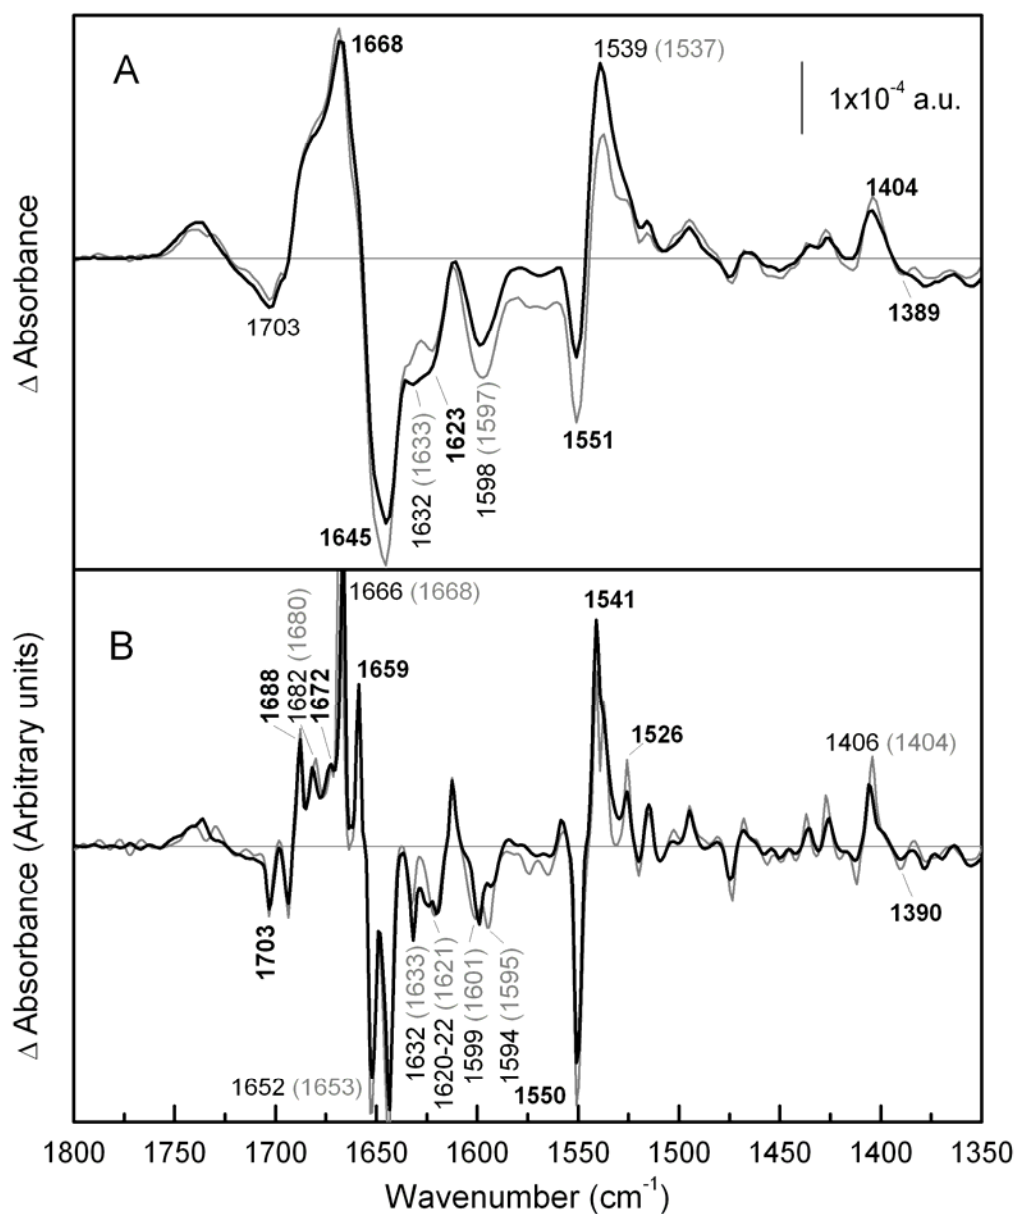

Fig. S2. Comparison of melibiose-induced difference spectra of Cys-less and WT permeases in the presence of Na<sup>+</sup>. (A) (*solid line*) difference spectrum of Cys-less in 20 mM MES, 100 mM KCl, 10 mM NaCl, 10 mM melibiose, pH 6.6 minus Cys-less in 20 mM MES, 100 mM KCl, 10 mM NaCl, pH 6.6; (*shaded line*) difference spectrum of WT under the same conditions. (B), deconvoluted difference spectra of (A).

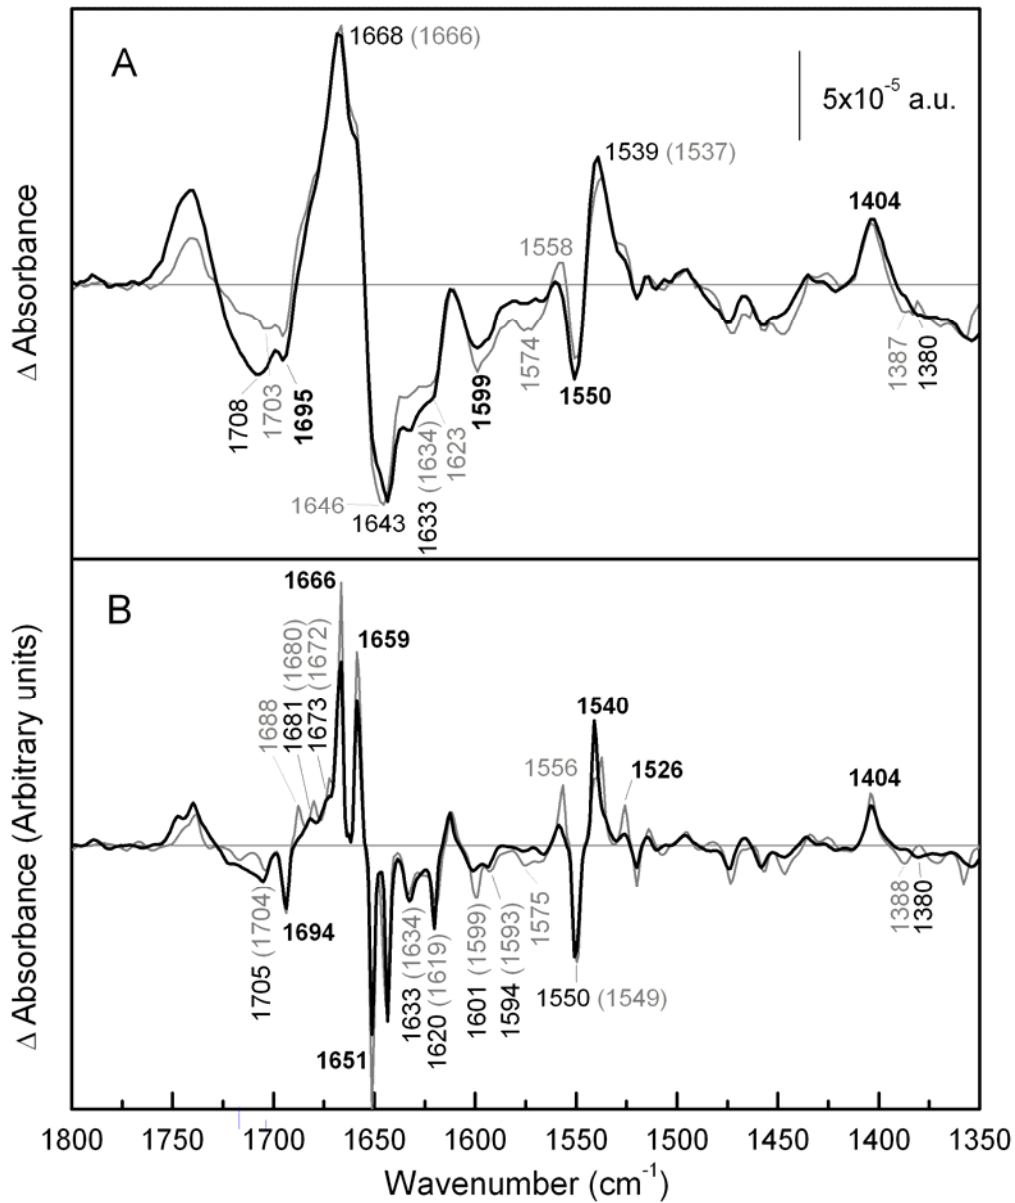

Fig. S3. Comparison of melibiose-induced difference spectra of Cys-less and WT permeases, in the presence of H<sup>+</sup>. (A) (*solid line*) difference spectrum of Cys-less in 20 mM MES, 100 mM KCl, 50 mM melibiose, pH 6.6 minus Cys-less in 20 mM MES, 100 mM KCl, pH 6.6; (*shaded line*) difference spectrum of WT under the same conditions. (B), deconvoluted difference spectra of (A).

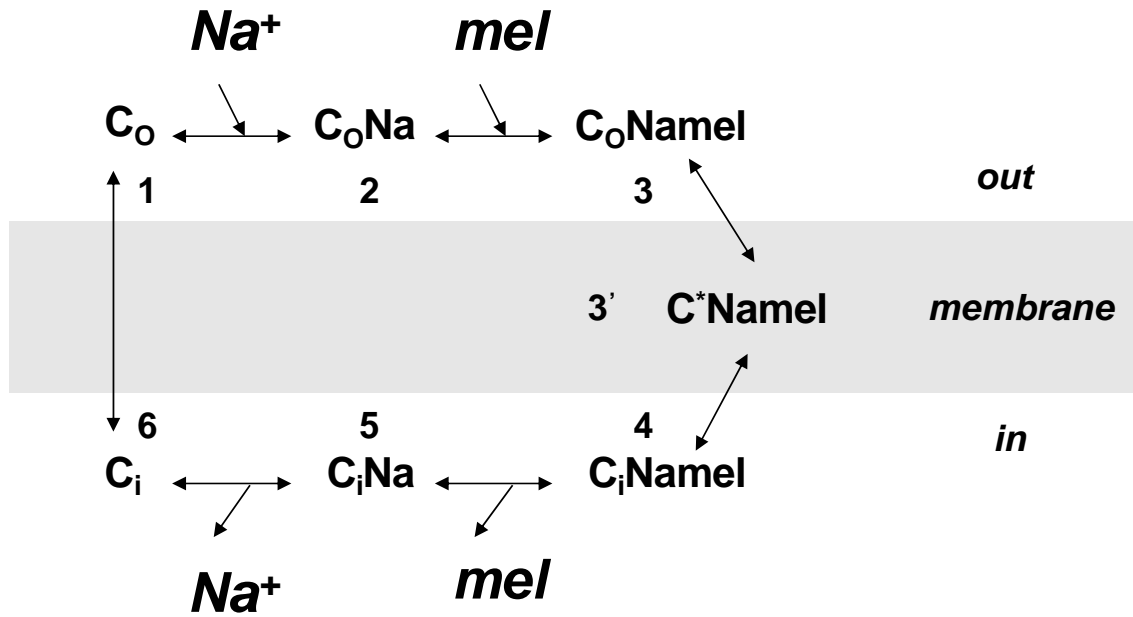

Fig. S4. Kinetic model of  $\text{Na}^+$ -sugar cotransport by MelB in physiological orientation. This kinetic model is adapted from an extended 6-state kinetic model initially suggested for MelB running in a backward direction by Meyer-Lipp et al (39). The  $\text{C}_O$ ,  $\text{C}^*$  and  $\text{C}_i$  indicate MelB states with an outward-facing, occluded or inward-facing conformation, respectively. Starting from  $\text{C}_O$  (empty carrier), binding of  $\text{Na}^+$  and then melibiose successively drives the outward-facing transporter into the  $\text{C}_O\text{Na}$  and  $\text{C}_O\text{Name}$  states (5). The outward-facing to inward-facing carrier reorientation towards the cytoplasm ( $\text{C}_O\text{Name} \leftrightarrow \text{C}_i\text{Name}$ ) is proposed to include an intermediate occluded state ( $\text{C}^*\text{Name}$ ). After sequential release of melibiose ( $\text{C}_i\text{Name} \leftrightarrow \text{C}_i\text{Na}$ ) and  $\text{Na}^+$  ( $\text{C}_i\text{Na} \leftrightarrow \text{C}_i$ ) into the inner compartment (3), MelB cycling ends by a return of the empty carrier towards the outer membrane surface ( $\text{C}_i \leftrightarrow \text{C}_O$ ).
